**Title:** Nuclear polymorphism and non-proliferative adult neurogenesis in human neural crest-derived cells.

**Authors:** Carlos Bueno<sup>1\*</sup>, Marta Martínez-Morga<sup>2</sup> and Salvador Martínez<sup>1</sup>.

<sup>1</sup> Instituto de Neurociencias de Alicante (UMH-CSIC), San Juan, Alicante, 03550, Spain.

<sup>2</sup> Department of Human Anatomy and Institute of Biomedical Research (IMIB), University of Murcia, Faculty of Medicine, Murcia, 30800, Spain.

**\*Corresponding author:** Carlos Bueno, PhD., Instituto de Neurociencias de Alicante. UMH-CSIC, Campus de San Juan, E-03550-Alicante, Spain. Tel.: 0034-96-591-9556. Fax: 0034-96-591-9555. E-mail: [cbueno@umh.es](mailto:cbueno@umh.es)

**Keywords:** Nucleus; Nuclear remodeling; Neurogenesis; Neuronal polarization; Neural differentiation; Neural stem cells; Adult stem cells; Neural-crest stem cells; Human periodontal ligament stem cells.

## Abstract

Self-renewal and lineage regulation of neural stem cells in the adult mammalian brain (aNSCs) are still far from been understood. Although previous studies have reported that some aNSCs in neurogenic niches showed irregular nuclei, their functional significance remains elusive. We used neural crest-derived human periodontal ligament stem cells (hPDLSCs) as an *in vitro* cell-model of neurogenesis to investigate the functional significance of nuclear polymorphisms. Here, we show that hPDLSCs-derived neurons are not directly generated through cell division from stem cells. In fact, the cell shape of neural precursors is reset and start their neuronal development as round spheres. To our knowledge, this article provides the first observation of these morphological events during *in vitro* neurogenesis and neuron polarization in human aNCSCs, and we have discovered a transient cell nuclei lobulation coincident to *in vitro* neurogenesis, without being related to cell proliferation. Morphological analysis also reveals that the V-SVZ of the anterolateral ventricle wall and the SGZ of the hippocampal dentate gyrus in the adult mouse brain contains cells with nuclear shapes highly similar to those observed during *in vitro* neurogenesis from hPDLSCs. Our results provide strong evidence that neuronal differentiation from aNSCs may also occur during *in vivo* adult mammalian neurogenesis without being related to cell proliferation. In addition, we demonstrate that hPDLSC-derived neurons and primary neuronal cultures derived from rodent brains show similar polarity formation patterns during neurogenesis, providing strong evidence that it is possible to reproduce neurogenic processes and obtain human neurons from hPDLSCs.

## Introduction

Neural stem cells (NSCs) are multipotent populations of undifferentiated cells present both during development and in the adult central nervous system that give rise to new neurons and glia.<sup>1</sup> The self-renewal and multipotent properties demonstrated by NSC *in vitro*<sup>2</sup> have not been clearly demonstrated *in vivo*.<sup>1,3-5</sup> The presence of neural stem cells in the adult mammalian brain (aNSCs) have been described in two neurogenic niches, the ventricular-subventricular zone (V-SVZ) of the anterolateral ventricle wall<sup>6,7</sup> and the subgranular zone (SGZ) of the hippocampal dentate gyrus.<sup>8-11</sup>

The study of the cell composition of neurogenic niches and the use of methods for detecting proliferating cells, suggest that neurogenesis occurs progressively through sequential phases of proliferation and the neuronal differentiation of aNSCs. In the V-SVZ, putative aNSCs (type B cells) divide to give rise to intermediate progenitor cells (type C cells), which in turn generate polarized neuroblasts (type A cells). The neuroblast then migrate into the olfactory bulb and differentiate into distinct types of neurons. In the SGZ, putative aNSCs (type 1 cells) divide to give rise to intermediate progenitor cells (type-2 cells) which exhibit limited rounds of proliferation before generating polarized neuroblast (type-3 cells). Neuroblast, as polarized cells, then migrate, guided by the leading process, along SGZ and differentiate into dentate granule neurons.<sup>5,12</sup>

Ultrastructure and immunocytochemistry studies show that the V-SVZ stem cell niche contains cells with irregular (polymorphic) nuclei. Type-B cells have irregular nuclei that frequently contain invaginations. Type-C cells nuclei contain deep invaginations and Type-A cell nuclei are also occasionally invaginated.<sup>6</sup> Furthermore, recent studies have shown that murine and human V-SVZ have segmented nuclei connected by an internuclear bridge.<sup>13-15</sup> Although it has been suggested that these are associated with quiescence in aNSCs,<sup>15</sup> the functional significance of different nuclear morphologies remains elusive.

In addition, how neuroblasts acquire the appropriate cell polarity to initiate their migration remains unclear.<sup>16</sup> The process of neuronal polarization has been studied for decades using dissociated rodent embryonic hippocampal pyramidal neurons and postnatal cerebellar granule neurons in culture.<sup>17,18</sup> During neuronal polarization *in vitro*, the morphological changes in cultured neurons are divided into different stages.

Upon isolation, dissociated pyramidal neurons retract their processes, so that their development *in vitro* begins as rounded spheres that spread lamellipodia (stage 1). These spheres appear symmetrical, extending and retracting several immature neurites of a similar length (stage 2). Elongation of a single process, that which presumably becomes the axon, breaks this symmetry (stage 3). The next step involves the remaining short neurites morphologically developing into dendrites (stage 4) and the functional polarization of axon and dendrites (stage 5), including dendritic spine and synapse formation.<sup>19</sup> Dissociated granule neurons also present a lamellipodia after attaching to the substratum (stage 1). These spheres extend a unipolar process at a single

site on the plasma membrane (stage 2) followed by extension of a second process from the opposite side of the cell body, resulting in a bipolar morphology (stage 3). One of the two axon elongates further and start branching (stage 4), and shorter dendritic processes develop around the cell body (stage 5).<sup>20</sup>

Understanding the sequence of events from aNSCs to neuron is not only important for the basic knowledge of NSCs biology, but also for therapeutic applications.<sup>21</sup> The major barrier to studying human aNSCs is the inaccessibility of living tissue, therefore an enormous effort has been made in this study to derive neurons from human stem cells.<sup>22</sup> *In vitro* models of adult neurogenesis mainly utilize fetal, postnatal and adult NSCs.<sup>23</sup> Neural crest stem cells (NCSCs) are a migratory cell population that generate numerous cell lineages during development, including neurons and glia.<sup>24,25</sup> NCSCs are present not only in the embryonic neural crest, but also in various neural crest-derived tissues in the fetal and even adult organs.<sup>26</sup> The periodontal ligament is a connective tissue surrounding the tooth root that contains a source of human NCSCs which can be accessed with minimal technical requirements and little inconvenience to the donor.<sup>27</sup>

In previous publication, we showed that several stem cell and neural crest cell markers are expressed in human adult periodontal ligament (hPDL) tissue and hPDL-derived cells. *In vitro*, hPDL-derived cells differentiate into neural-like cells based on cellular morphology and neural marker expression. *In vivo*, hPDL-derived cells survive, migrate and expressed neural markers after being grafted to the adult mouse brain. Moreover, some hPDL-derived cells graft into stem cell niches such as V-SVZ of the anterolateral ventricle wall and the SGZ of the dentate gyrus in the hippocampus. The hPDL-derived cells located in the stem cell niches show neural stem morphology.<sup>28</sup> Therefore, the neural crest origin and neural potential make human periodontal ligament stem cells (hPDLSCs) interesting as an *in vitro* human cell model of neurogenesis for investigating aNSCs to neuron differentiation mechanisms.

Here, we show that hPDLSCs-derived neurons are not directly generated through cell division from stem cells. In fact, the cell shape of neural precursors is reset and start their neuronal development as round spheres. To our knowledge, this article provides the first observation of these morphological events during *in vitro* neurogenesis and neuron polarization in human aNCSCs, and we have discovered a transient cell nuclei lobulation coincident to *in vitro*

neurogenesis, without being related to cell proliferation. Morphological analysis also reveals that the V-SVZ of the anterolateral ventricle wall and the SGZ of the hippocampal dentate gyrus in the adult mouse brain contains cells with nuclear shapes highly similar to those observed during *in vitro* neurogenesis from hPDLSCs, suggesting that neuronal differentiation from aNSCs may also occur during *in vivo* adult mammalian neurogenesis without being related to cell proliferation.

In addition, we demonstrate that hPDLSC-derived neurons and primary neuronal cultures derived from rodent brains show similar polarity formation patterns during neurogenesis, providing strong evidence that it is possible to reproduce neurogenic processes and obtain neurons from hPDLSCs. Thus, hPDLSCs could be used as an *in vitro* human cell-based model for neurogenesis and neuronal polarization.

## Results

As noted in the introduction, the aim of this work was to evaluate the sequence of biological events occurring during the neural differentiation of hPDLSCs. Morphological characteristics of the hPDLSCs, including cell shape, cell surface features, cytoskeleton, and nuclear morphology were examined in cells under proliferation and neural differentiation conditions.

### hPDLSCs cultured in basal media

Under proliferation conditions, hPDLSCs displayed a fibroblast-like morphology with low-density microvilli on the cell surface (Fig. 1A) and actin microfilaments and  $\beta$ -III tubulin microtubules oriented parallel to the longitudinal axis of the cell (Fig. 1B). The cytoskeletal protein class III beta-tubulin isotype is widely regarded as a neuronal marker in developmental neurobiology and stem cell research.<sup>29</sup> Dental and oral-derived stem cells displayed spontaneous expression of neural marker  $\beta$ -III tubulin, even without having been subjected to neural induction.<sup>30</sup> Western blot analysis verified the expression of  $\beta$ -III tubulin in hPDLSCs (Fig. 1C). During mitosis,  $\beta$ -III tubulin is present in mitotic hPDLSCs and it is detectable in all phases of mitosis (Fig. D). The cytoskeletal protein class III beta-tubulin isotype is a component of the mitotic spindle in multiple cell types<sup>31</sup>. During interphase, undifferentiated hPDL-derived cells displayed

a flattened, ellipsoidal nucleus, often located in the center of the cell and with a nuclear volume around  $925\text{'}356 \pm 52\text{'6184 } \mu\text{m}^3$  (Fig. 1E).

### **hPDLSCs cultured in neural induction media**

After 14 days of neural differentiation conditions, the hPDLSCs displayed different morphologies, including round cells with small phase-bright cell bodies and short processes; highly irregularly-shaped cells; and, also, unipolar, bipolar and multipolar-shaped cells with small phase-bright cell bodies and multiple branched processes (Fig. 1F). In addition, cells of different size were also observed (Fig. 1G). Furthermore, microscopic analysis revealed that some hPDLSCs have different nuclear shapes, including lobed nuclei connected by an internuclear bridge (Fig. 1H). The results indicate that the cell culture simultaneously contains hPDLSCs at different stages of neurogenesis and neuronal polarization. We acknowledge that the definitive sequence of *in vitro* neurogenesis and neuronal polarization from hPDLSCs will be provided only by time-lapse microscopy of a single cell, but in our experimental conditions, several pieces of data suggest how these steps may occur.

### **In vitro neurogenesis from hPDLSCs.**

After neural induction, hPDLSCs undergo a dramatic change in shape and size, first adopting highly irregular forms and then gradually contracting into round cells with small phase-bright cell bodies (Fig. 2A). Cytoskeletal remodeling is observed during the morphological changes that occurred when the hPDLSCs round up to a near-spherical shape. Actin microfilament no longer surround the nucleus and became cortical. Unlike actin,  $\beta$ -III tubulin seems to accumulate around the nucleus (Fig. 2B). Actin microfilament and  $\beta$ -III tubulin microtubule network are almost lost in the rounded cells (Fig. 2C). Scanning electron micrographs show that hPDLSCs also experience dramatic changes in cell surface features. Under proliferation conditions, hPDLSCs remain very flat, presenting low-density microvilli on their surface, but there is a marked increase in the number of microvilli as the cells round up to near-spherical shape (Fig. 3D). The surface of the round cells is almost devoid of microvilli (Fig. 3E).

## Neuronal polarization of hPDLSCs-derived neurons.

Morphological analysis revealed that hPDLSCs-derived neurons display a sequence of morphologic development highly similar to those observed in dissociated-cell cultures prepared from rodent brain (Fig. 3, 4 and 5). hPDLSCs-derived neurons also start their development as rounded spheres that initiated neurite outgrowth at a single site on the plasma membrane, first becoming unipolar, stages 1-2 (Fig. 3A). We did not observe the development of lamellipodia around the circumference of the cell body. These unipolar cells, later transformed into cells containing several short neurites, developed around the cell body, stage 3 (Fig. 3B). An analysis of the cytoskeletal organization during spherical stages of hPDLSCs-derived neurons showed that the  $\beta$ -III microtubules and actin microfilament network is reorganized. Cytoskeletal protein  $\beta$ -III tubulin was densely accumulated under the cell membrane of the hPDLSCs-derived neurons cell bodies and in cell neurites (Fig. 3A and 3B) while actin microfilaments were mainly found in cell neurites (Fig. 3C). We observed that hPDLSCs-derived neurons produce neurites that showed growth cone formations at their tips (Fig. 3C and 3D). The central domain of the growth cone contains  $\beta$ -III tubulin microtubules and the peripheral domain is composed of radial F-actin bundles (Fig. 3D), similar to the typical spatial organization described in neurons.<sup>32,33</sup> Scanning electron micrographs also showed that the growth cone of hPDLSCs-derived neurons contained filopodia and vesicles on the cell surface (Fig. 3E). These findings are consistent with a previous study reporting that membrane addition and extension in growth cones is mediated by diverse mechanisms, including exocytosis of vesicular components.<sup>34</sup>

At later stages of differentiation, the hPDLSCs-derived neurons gradually adopted a complex morphology by forming several processes, stage 4 (Fig. 3F) that grew and arborized, acquiring dendritic-like and axonal-like identities, giving rise to a variety of neuron-like morphologies (Fig. 3G). The next step, stage 5, in neuronal polarization from rodent neurons in culture is the functional polarization of axon and dendrites, including dendritic spine formation and axon branch formation. Dendritic spines are micron-sized dendrite membrane protrusions.<sup>35</sup> Depending on the relative sizes of the spine head and neck, they can be subdivided into different categories, including filopodium, mushroom, thin, stubby, and branched spines.<sup>36</sup> Dendritic spines are actin-rich compartments that protrude from the microtubule-rich dendritic shafts of principal neurons.<sup>37</sup>

Based on morphology, complexity, and function, axon branching is grouped into different categories, including arborization, bifurcation, and collateral formation.<sup>38</sup>

Our morphological analysis revealed that hPDLSCs-derived neurons developed well-differentiated axonal-like and dendritic-like domains. These types of processes differ from each other in morphology (Fig. 3H-4D). Cytoskeletal protein  $\beta$ -III tubulin and F-actin staining showed that the hPDLSCs-derived neurons comprised multiple branched dendrite-like processes with dendritic spines-like structures (Fig. 3H). Scanning electron micrographs showed that the hPDLSCs-derived neurons also contained multiple branched dendrite-like processes with variously shaped spine-like protusions, highly similar to filopodium, mushroom, thin, stubby, and branched dendritic spines shapes (Fig. 4A). Furthermore, hPDLSCs-derived neurons also displayed different types of axonal branch-like structures, including bifurcation (Fig. 4B), arborization (Fig. 4C), and collateral formation (Fig. 4D).

The last step in neuronal polarization from rodent neurons in culture is synapse formation. The most frequent types of synaptic communication include axodendritic, axosomatic, axoaxonic and dendrodendritic synapses. Morphological analysis revealed that the hPDLSCs-derived neurons connected to one another (Fig. 5A) through different types of synapse-like interactions, including dendrodendritic-like, axoaxonic-like and axodendritic-like synapses (Fig. 5B). Synapse-associated proteins Cx43, Synaptophysin and Synapsin1 were found accumulated in the cell surface of neurites (Fig. 5C).

### **Nuclear remodeling**

As noted above, undifferentiated hPDL-derived cell displayed a flattened, ellipsoidal nucleus, often located in the center of the cell, and with a nuclear volume around  $925'356 \pm 52'6184 \mu\text{m}^3$  (Fig. 1D). Morphological analysis revealed that nuclear remodeling, including nuclear shape, nuclear volume, and nuclear position within the cell, occurred during *in vitro* neurogenesis from hPDLSCs (Fig. 6). We acknowledge that the definitive sequence of nuclear remodeling when hPDLSCs round up to near-spherical shape will only be provided by time-lapse microscopy, but our accumulated data suggests how these steps may occur.



The nucleus located in the center of the cell start to move towards an asymmetrical position within the cell (Fig. 6A-6I). This nuclear movement is accompanied by the transient formation of lobed nuclei connected by an internuclear bridge (Fig. 6J-6T). Finally, there is restoration of irregular, but non-lobed, nucleus with an eccentric position within hPDLSCs-derived neurons (Fig. 6U-6Z). Although it has been suggested that lobed nuclei connected by an internuclear bridge are associated with quiescence in aNSCs,<sup>15</sup> we observed that this kind of nuclei is associated to nuclear movement within the cell during initial phases of neurogenesis, without being related to cell proliferation.

Interestingly, the morphological analysis revealed that the adult rodent V-SVZ of the anterolateral ventricle wall (Fig. 7A) and the SGZ of the hippocampal dentate gyrus (Fig. 7B), where adult neurogenesis has been clearly demonstrated, contained abundant cells with nuclear shapes highly similar to those observed during *in vitro* neurogenesis from hPDLSCs. No lobed nuclei were observed as PDL-derived neurons gradually acquired a more mature neuronal-like morphology (Fig. 8A). We also found that as the cells round up to a near-spherical shape the nuclear volume of the hPDLSCs decreases to an approximate volume of  $279'589 \pm 38'8905 \mu\text{m}^3$  (Fig. 8B). Mitotic chromosomes and mitotic spindle were not observed during the described of *in vitro* neurogenesis processes or neuronal polarization from hPDLSCs (Fig. 6 and 8).

## Discussion

In this study, we show that hPDLSCs-derived neurons are not directly generated through cell division from stem cells. The undifferentiated polygonal and fusiform cell shapes are reset and start their neuronal development as rounded spheres. To our knowledge, this article provides the first observations of these morphological events during *in vitro* neurogenesis and neuron polarization from human aNCSCs, and we have discovered a transient cell nuclei lobulation coincident to *in vitro* neurogenesis, without being related to cell proliferation. Morphological analysis also revealed that the adult rodent V-SVZ of the anterolateral ventricle wall, as well as the SGZ of the hippocampal dentate gyrus, where adult neurogenesis has been clearly

demonstrated, contains cells with nuclear shapes highly similar to those observed during *in vitro* neurogenesis from hPDLSCs.

Previous ultrastructure and immunocytochemistry studies also show that the V-SVZ stem cell niche contains cells with different morphologies and irregular nuclei.<sup>6,7</sup> Type-B cells have irregular nuclei that frequently contain invaginations and irregular contours of the plasma membrane. Type-C cells nuclei contained deep invaginations and these cells are more spherical. Type-A cells have elongated cell body with one or two processes and the nuclei are occasionally invaginated. Furthermore, recent studies have shown that murine and human V-SVZ have segmented nuclei connected by an internuclear bridge.<sup>13-15</sup> In addition, previous studies shown irregular shaped BrdU-positive nuclei in the adult SGZ.<sup>39,40</sup> Adult SGZ NSCs (type 1 cells) have irregular contours of the plasma membrane, and differences in heterochromatin aggregation has been also observed.<sup>8</sup>

It has commonly been assumed that neurogenesis occurs progressively through sequential phases of proliferation.<sup>5,12</sup> Despite the advantages for the detection of neurogenesis using exogenous thymidine analog administration or endogenous cell cycle markers, in addition to cell stage and lineage commitment markers, recent findings indicate that some observations interpreted as cell division could be normal DNA turnover or DNA repair.<sup>41,42</sup> Thymidine analogs such as tritiated thymidine and BrdU may also be incorporated during DNA synthesis that is not related to cell proliferation.<sup>43,44</sup> Proliferating cell nuclear antigen is also involved in DNA repair.<sup>45</sup> Positivity of the proliferation marker KI-67 in noncycling cells has also been observed.<sup>46</sup> In addition, the self-renewal and multipotent properties demonstrated by NSC *in vitro*<sup>2</sup> have not been clearly demonstrated *in vivo*.<sup>1,3-5</sup>

Taken together, these results suggest that the sequence of events from aNSCs to neuron may also occur without being related to cell proliferation. It would therefore be interesting to examine whether SVZ and SGZ intermediate progenitor cells represent different stages of neurogenesis without being related to cell proliferation.

Beyond the central nervous system, the presence of lobed nuclei has been reported in most blood and immune cells, but the functional significance of multilobed nuclear structures is not yet known.<sup>47,48</sup> It would also be interesting to examine whether these putative mature cells also

represent different stages of haematopoietic stem cell differentiation without being related to cell proliferation.

Furthermore hPDLSCs-derived neurons and dissociated-cell cultures prepared from rodent brains show similar phases in the of polarity formation process, providing strong additional evidence that it is possible to obtain human neurons from hPDLSCs, as suggested by their neural-crest origin and stem cell characteristics.<sup>28</sup> Thus, hPDLSCs could be also used as an *in vitro* human cell-based model for neurogenesis and neuronal polarization.<sup>23</sup>

Alterations in nuclear morphologies are closely associated with a wide range of human diseases, including muscular dystrophy and cancer.<sup>49</sup> Thus, hPDLSCs could facilitate an understanding of the mechanisms regulating nuclear morphology in response to cell shape changes and their functional relevance.<sup>50,51</sup> In addition, the easy procedure for obtaining these from adults in normal or pathological conditions, may represent, as we have demonstrated with periodontal ligament cells from children,<sup>52,53</sup> a suitable way of developing *in vitro* cell models of human diseases. These results, together with our previously published data, show that the isolation and neural differentiation of hPDLSCs is a powerful tool in basic and translational research into the understanding of normal function and human central nervous system disorders.

## **Materials and Methods**

### ***Ethical approval***

Methods were carried out in accordance with the relevant guidelines and regulations. The experimental protocols were approved by the Institutional Review Board of the Miguel Hernández University of Elche (No. UMH.IN.SM.03.16) and the informed consent was obtained from all patients before the study. The authors declare that all experiments on human subjects were conducted in accordance with the Declaration of Helsinki.

### ***Cell Culture***

Human premolars were extracted and collected from normal adult patients undergoing orthodontic therapy in Murcia dental hospital (Spain). hPDL was scraped from the middle third

region of the root surface. After washing the extracted PDL with Ca and Mg-free Hank's balance salt solution (HBSS; Gibco), hPDL was digested with 3 mg/ml type I collagenase (Worthington Biochemical Corporation) and 4 mg/ml dispase II (Gibco) in alpha modification minimum essential medium eagle ( $\alpha$ -MEM) ( $\alpha$ -MEM; Sigma-Aldrich) for 1 h at 37°C. The reaction was stopped by the addition of  $\alpha$ -MEM. The dissociated tissue was passed through a 70- $\mu$ m cell strainer (BD Falcon). Cells were centrifuged, and the pellet was resuspended in in serum-containing media (designated as the basal media), composed of  $\alpha$ -MEM supplemented with 15% calf serum (Sigma), 100 units/ml penicillin-streptomycin (Sigma) and 2 mM l-glutamine (Sigma). The cell suspension was plated into six-well multiwell plates (BD Falcon) and incubated at 37°C in 5% CO<sub>2</sub>. To induce neural differentiation, cells were cultured in serum-free media (designated as the neural induction media), consisting in Dulbecco's modified Eagle's medium/F12 (DMEM/F12, Gibco) supplemented with bFGF (20 ng/ml, R&D Systems), EGF (20 ng/ml, R&D Systems), glucose (0.8 mg/ml, Sigma), N2-supplement (Gibco), 2 mM l-glutamine (Sigma), and 100 units/ml penicillin-streptomycin (Sigma). Neural induction media were changed every 3-4 days until the end of the experiment (2 weeks).

### ***Immunocytochemistry***

Cells were plated onto poli-L-lysine (10  $\mu$ g/ml, Sigma-Aldrich) coated plastic or glass coverslips, and maintained in basal media or neural induction media. Cells were rinsed with PBS and fixed in freshly prepared 4% paraformaldehyde (PFA; Sigma). Fixed cells were blocked for 1 h in PBS containing 10% normal horse serum (Gibco) and 0.25% Triton X-100 (Sigma) and incubated overnight at 4°C with antibodies against:  $\beta$ -III-tubulin (TUJ1; 1:500, Covance), Connexin 43 (3512; 1/300, Cell Signalling), Synaptophysin (18-0130; 1/300, Zymed) and Synapsin1 (NB300-104; 1/300, Novus) in PBS containing 1% normal horse serum and 0.25% Triton X-100. On the next day, cells were rinsed and incubated with the corresponding secondary antibodies: Alexa Fluor® 488 (anti-mouse or anti-rabbit; 1:500, Molecular Probes), Alexa Fluor® 594 (anti-mouse or anti-rabbit; 1:500, Molecular Probes), biotinylated anti-rabbit (BA1000, 1:250; Vector Laboratories), biotinylated anti-chicken (BA9010, 1:250, Vector Laboratories, CY3-streptavidin (1:500, GE Healthcare). Cell nuclei were counterstained with DAPI (0.2 mg/ml in PBS, Molecular Probes). Alexa Fluor 488® phalloidin was used to selectively stains F-actin (Molecular Probes).

## **Western Blotting**

hPDL-derived cells were harvested using trypsin/EDTA (Gibco), washed twice with PBS, resuspended in RIPA lysis buffer (Millipore) for 30 min at 4°C in the presence of protease inhibitors (Pierce™ protease inhibitor Mini Tablets, Pierce Biotechnology Inc) and PMSF 1M (Abcam). Protein concentration was determined using the Bradford protein assay (Sigma-Aldrich). Proteins were separated in 8% SDS-polyacrylamide gel (PAGE-SDS) and transferred to a nitrocellulose membrane (Whatman). PageRuler™ Prestained Protein Ladder (Thermo Scientific) has been used as size standards in protein electrophoresis (SDS-PAGE) and western-blotting. After transfer, nitrocellulose membranes were stained with Ponceau S solution (Sigma-Aldrich) to visualize protein bands. Blots were then incubated over-night at 4°C with rabbit antibody against  $\beta$ -III-tubulin (TUJ1; 1:1000, Covance). Secondary antibody was used at 1:7000 for peroxidase anti-mouse Ab (PI-2000, Vector Laboratories). Immunoreactivity was detected using the enhanced chemiluminescence (ECL) Western blot detection system (Amersham Biosciences Europe) and Luminata™ Forte (Millipore corporation) using ImageQuant LAS 500 Gel Documentation System (GE Healthcare). The molecular weight of  $\beta$ -III-tubulin is approximately 55 kDa.

## **Immunohistochemistry**

Experiments were carried out according to the guidelines of the European Community (Directive 86/609/ECC) and in accordance with the Society for Neuroscience recommendations. Animals used in this study were 12-week-old immune-suppressed mouse (Hsd:Athymic Nude-Foxn1 nu/nu; Harlan Laboratories Models, S.L), housed in a temperature and humidity controlled room, under a 12h light/dark cycles, with *ad libitum* access to food and water. The animals were anesthetized with an overdose of chloral hydrate and intracardially perfused with freshly prepared, buffered 4% PFA (in 0.1M PB, pH 7.4). Brains were removed, post-fixed for 12 hr in the same fixative at 4°C and dehydrated in 30% sucrose solution at 4°C until sunk. 30 $\mu$ m thick coronal sections were collected using a freezing microtome. Serial sections were used for DAPI staining. Free-floating sections were incubated and mounted onto Superfrost Plus glass slides (Thermo Scientific). The slides were dried O/N and coverslipped with mowiol-NPG (Calbiochem).

## ***Images and data analyses***

Analyses and photography of visible and fluorescent stained samples were carried out in an inverted Leica DM IRB microscope equipped with a digital camera Leica DFC350FX (Nussloch) or in confocal laser scanning microscope Leica TCS-SP8. Digitized images were analyzed using LASX Leica confocal software. Z-stacks of confocal fluorescent images were also analyzed to calculate the nuclear volume by using ImageJ software.

## ***Scanning electron microscopy***

Cells were plated onto poli-L-lysine (10 µg/ml, Sigma-Aldrich) coated glass coverslips and maintained in basal media or neural induction media. Cells were treated with fixative for 20 minutes. Coverslips were postfixed in 1% osmium tetroxide for 1 hour and dehydrated in graded ethanol washes. The coverslips were allowed to dry at a conventional critical point and were then coated with gold-palladium sputter coated. Coverslips were view on a Jeol 6100 scanning electron microscope.

## **Acknowledgments**

We greatly appreciate the technical assistance of Microscopy Section of the University of Murcia in preparing samples for scanning electron microscopy.

## **References**

1. Conti L, Cattaneo E. Neural stem cell systems: physiological players or in vitro entities? *Nat Rev Neurosci* 2010 Mar;11(3):176-87.
2. Reynolds BA, Weiss S. Generation of neurons and astrocytes from isolated cells of the adult mammalian central nervous system. *Science* 1992 Mar 27;255(5052):1707-10.
3. Gabay L, Lowell S, Rubin LL, Anderson DJ. Deregulation of dorsoventral patterning by FGF confers trilineage differentiation capacity on CNS stem cells in vitro. *Neuron* 2003 Oct 30;40(3):485-99.

4. Suh H, Consiglio A, Ray J, Sawai T, D'Amour KA, Gage FH. In vivo fate analysis reveals the multipotent and self-renewal capacities of Sox2+ neural stem cells in the adult hippocampus. *Cell Stem Cell* 2007 Nov;1(5):515-28.
5. Bond AM, Ming GL, Song H. Adult mammalian neural stem cells and neurogenesis: five decades later. *Cell Stem Cell* 2015 Oct 1;17(4):385-95.
6. Doetsch F, Garcia-verdugo JM, Alvarez-buylla A. Cellular composition and three-dimensional organization of the subventricular germinal zone in the adult mammalian brain. *J Neurosci* 1997 Jul 1;17(13):5046-61.
7. Doetsch F, Caillé I, Garcia-verdugo JM, Alvarez-buylla A. Subventricular zone astrocytes are neural stem cells in the adult mammalian brain. *Cell* 1999 Jun 11;97(6):703-16.
8. Seri B, Garcia-verdugo JM, McEwen BS, Alvarez-buylla A. Astrocytes give rise to new neurons in the adult mammalian hippocampus. *J Neurosci* 2001 Sep 15;21(18):7153-60.
9. Seri B, Garcia-verdugo JM, Collado-Morente L, McEwen BS, Alvarez-buylla A. Cell types, lineage, and architecture of the germinal zone in the adult dentate gyrus. *J Comp Neurol* 2004 Oct 25;478(4):359-78.
10. Filippov V, Kronenberg G, Pivneva T, Reuter K., Steiner B, Wang LP, et al. Subpopulation of nestin-expressing progenitor cells in the adult murine hippocampus shows electrophysiological and morphological characteristics of astrocytes. *Mol Cell Neurosci* 2003 Jul;23(3):373-82.
11. Fukuda S, Kato F, Tozuka Y, Yamaguchi M, Miyamoto Y, Hisatsune T. (2003). Two distinct subpopulations of nestin-positive cells in adult mouse dentate gyrus. *J Neurosci* 2003 Oct 15;23(28):9357-66.
12. Fuentealba LC, Obernier K, Alvarez-Buylla A. Adult stem cells bridge their niche. *Cell Stem Cell* 2012 Jun 14;10(6):698-708.
13. Guerrero-Cázares H, Gonzalez-Perez O, Soriano-Navarro M, Zamora-Berridi G, García-Verdugo JM, Quinoñes-Hinojosa A. Cytoarchitecture of the lateral ganglionic eminence and rostral extension of the lateral ventricle in the human fetal brain. *J Comp Neurol* 2011 Apr 15;519(6):1165-80.

14. Capilla-Gonzalez V, Cebrian-Silla A, Guerrero-Cazares H, Garcia-Verdugo JM, Quiñones-Hinojosa A. Age-related changes in astrocytic and ependymal cells of the subventricular zone. *Glia* 2014 May;62(5):790-803.
15. Cebrián-Silla A, Alfaro-Cervelló C, Herranz-Pérez V, Kaneko N, Park DH, Sawamoto K, et al. (2017). Unique organization of the nuclear envelope in the post-natal quiescent neural stem cells. *Stem Cell Reports* 2017 Jul 11;9(1):203-216.
16. Ghashghaei HT, Lai C, Anton ES. Neuronal migration in the adult brain: are we there yet? *Nat Rev Neurosci* 2007 Feb;8(2):141-51.
17. Tahirovic S, Bradke F. Neuronal polarity. *Cold Spring Harb Perspect. Biol* 2009 Sep;1(3):a001644.
18. Takano T, Xu C, Funahashi Y, Namba T, Kaibuchi K. Neuronal polarization. *Development* 2015 Jun 15;142(12):2088-93.
19. Dotti CG, Sullivan CA., Banker GA. The establishment of polarity by hippocampal neurons in culture. *J Neurosci* 1988 Apr;8(4):1454-68.
20. Powell SK, Rivas RJ, Rodriguez-Boulan E, Hatten ME. Development of polarity in cerebellar granule neurons. *J Neurobiol* 1997 Feb;32(2):223-36.
21. Casarosa S, Bozzi Y, Conti L. Neural stem cells: ready for therapeutic applications? *Mol Cell Ther* 2014 Oct 15;2:31.
22. Goldman SA. Stem and progenitor cell-based therapy of the central nervous system: hopes, hype, and wishful thinking. *Cell Stem Cell* 2016 Feb 4;18(2):174-88.
23. Azari H, Reynolds BA. In vitro models for neurogenesis. *Cold Spring Harbour Perspectives in Biology* 2016 Jun 1;8(6).
24. Bronner-Fraser M. Origins and developmental potential of the neural crest. *Exp Cell Res* 1995 Jun;218(2):405-17.
25. Crane JF, Trainor PA. Neural crest stem and progenitor cells. *Annu Rev Cell Dev Biol* 2006;22:267-86.



26. Achilleos A, Trainor PA. Neural crest stem cells: discovery, properties and potential for therapy. *Cell Res* 2012 Feb;22(2):288-304.
27. Liu JA, Cheung M. Neural crest stem cell and their potential therapeutic applications. *Dev Biol* 2016 Nov 15;419(2):199-216.
28. Bueno C, Ramirez C, Rodríguez-Lozano FJ, Tabarés-Seisdedos R, Rodenas M, Moraleda JM, et al. Human adult periodontal ligament-derived cells integrate and differentiate after implantation into the adult mammalian brain. *Cell Transplant* 2013;22(11):2017-28.
29. Flynn KC. The cytoskeleton and neurite initiation. *BioArchitecture* 2013 Jul-Aug;3(4):86-109.
30. Foudah D, Monfrini M, Donzelli E, Niada S, Brini AT, Orciani M, et al. Expression of neural markers by undifferentiated mesenchymal-like stem cells from different sources. *J Immunol Res* 2014;2014:987678.
31. Jouhilahti EM, Peltonen S, Peltonen J. Class III beta-tubulin is a component of the mitotic spindle in multiple cell types. *J Histochem Cytochem.* 2008 Dec;56(12):1113-9.
32. Forscher P, Smith SJ. Actions of Cytochalasins on the organization of actin filaments and microtubules in a neuronal growth cone. *J Cell Biol* 1988 Oct;107(4):1505-16.
33. Blanquie O, Bradke F. Cytoskeleton dynamics in axon regeneration. *Curr Opin Neurobiol* 2018 Mar 12;51:60-69.
34. Ros O, Cotrufo T, Martinez-Marmol R, Soriano E. Regulation of patterned Dynamics of local exocytosis in growth cone by netrin-1. *J Neurosci* 2015 Apr 1;35(13):5156-70.
35. Hering H, Sheng M. Dendritic spines: Structure, dynamics and regulation. *Nature Rev Neurosci* 2001 Dec;2(12):880-8.
36. Von Bohlen Und Halbach O. Structure and functions of dendritic spines within the hippocampus. *Ann Anat* 2009 Dec;191(6):518-31.
37. Merriam EB, Millette M, Lombard DC, Saengsawang W, Fothergill T, Hu X, et al. Synaptic regulation of microtubule dynamics in dendritic spines by calcium, F-actin, and debrin. *J Neurosci* 2013 Oct 16;33(42):16471-82.

38. Gibson DA, Ma L. Developmental regulation of axon branching in the vertebrate nervous system. *Development* 2011 Jan;138(2):183-95.
39. Kuhn HG, Dickinson-Anson H, Gage FH. Neurogenesis in the dentate gyrus of the adult rat: Age-Related decrease of neuronal progenitor proliferation. *J Neurosci* 1996 Mar 15;16(6):2027-33.
40. Urbach A, Redecker C, Witte OW. Induction of neurogenesis in the adult dentate gyrus by cortical spreading depression. *Stroke* 2008 Nov;39(11):3064-72.
41. Sohur US, Emsley JG, Mitchell BD, Macklis JD. Adult neurogenesis and cellular brain repair with neural progenitors, precursors and stem cells. *Philos Trans R Soc Lond B Biol Sci* 2006 Sep 29;361(1473):1477-97.
42. Kuhn HG, Eisch AJ, Spalding K, Peterson DA. Detection and Phenotypic Characterization of Adult Neurogenesis. *Cold Spring Harb Perspect Biol* 2016 Mar 1;8(3):a025981.
43. Cameron HA, Woolley CS, McEwen BS, Gould E. Differentiation of newly born neurons and glia in the dentate gyrus of the adult rat. *Neuroscience* 1993 Sep;56(2):337-44.
44. Palmer TD, Ray J, Gage FH. FGF-2-responsive neuronal progenitors reside in proliferative and quiescent regions of the adult rodent brain. *Mol Cell Neurosci* 1995 Oct;6(5):474-86.
45. Uberti D, Ferrar-Toninelli G, Memo M. Involvement of DNA damage and repair systems in neurodegenerative process. *Oxicol Lett* 2003 Apr 4;139(2-3):99-105.
46. Van Oijen MG, Medema RH, Slootweg PJ, Rijksen G. Positivity of the proliferation marker Ki-67 in noncycling cells. *Am J Clin Pathol* 1998 Jul;110(1):24-31.
47. Carvalho LO, Aquino EN, Neves AC, Fontes W. The neutrophil nucleus and its role in neutrophilic function. *J Cell Biochem* 2015 Sep;116(9):1831-6.
48. Georgopoulos K. In search of the mechanism that shapes the neutrophil's nucleus *Genes Dev* 2017 Jan 15;31(2):85-87.
49. Gundersen GG, Worman HJ. Nuclear positioning. *Cell* 2013 Mar 14;152(6):1376-89.

50. Dupin I, Etienne-Manneville S. Nuclear positioning: mechanisms and functions. *Int. J. Biochem. Cell Biol* 2011 Dec;43(12):1698-707.

51. Skinner BM, Johnson EE. Nuclear morphologies: their diversity and functional relevance. *Chromosoma* 2017 Mar;126(2):195-212.

52. Jones J, Estirado A, Redondo C, Bueno C, Martínez S. (2012). Human adipose stem cell-conditioned médium increases survival of friedreich`s ataxia cells submitted to oxidative stress. *Stem Cells Dev* 2012 Oct 10;21(15):2817-26.

53. Quesada MP, Jones J, Rodríguez-Lozano FJ, Moraleda JM, Martinez S. Novel aberrant genetic and epigenetic events in friedreich´s ataxia. *Exp Cell Res* 2015 Jul 1;335(1):51-61.

## Figure legends

**Figure 1. Morphological changes in hPDLSCs cultures during neural induction.** (A and B) Undifferentiated hPDLSCs presented a fibroblast-like morphology with low-density microvilli on their surface (A) and actin microfilaments and  $\beta$ -III tubulin microtubules oriented parallel to the longitudinal axis of the cell (B). (C) Western blot analysis verified the expression of  $\beta$ -III tubulin. Protein size markers (in kilodaltons) are indicated on the side of the panel. (D) During mitosis,  $\beta$ -III tubulin is present in the mitotic spindle and it is detectable in all phases of mitosis. (E) Undifferentiated hPDLSCs displayed a flattened, ellipsoidal nucleus often located in the center of the cell. (F) After 14 days of neural differentiation conditions, hPDLSCs with different morphologies were observed. (G) In addition, hPDLSCs of various size were also observed. (H) Microscopic analysis also revealed that some hPDLSCs have different nuclear size and shapes, including segmented nuclei connected by an internuclear bridge. Scale bar: 25  $\mu$ m. SEM, scanning electron microscopy; LM, light microscopy.

**Figure 2. *In vitro* neurogenesis from hPDLSCs.** (A) After neural induction, hPDLSCs undergo a shape and size change, adopting highly irregular forms first and then gradually contracting into round cells. (B) Cytoskeletal remodeling is observed during these morphological changes. Actin microfilament not longer surround the nucleus and become cortical. Unlike actin,  $\beta$ -III tubulin

seems to accumulate around the nucleus. (C) the cytoskeletal network is almost lost in round cells. (D) Scanning electron micrographs show that there is a marked increase in the density of microvilli as the cells round up to near-spherical shape. (E) The surface of round cells is almost devoid of microvilli. The escale bars are 25  $\mu\text{m}$  in the light microscope images, and 10  $\mu\text{m}$  in the scanning electron micrographs. LM, light microscopy; SEM, scanning electron microscopy.

**Figure 3. Neuronal polarization of hPDLSCs-derived neurons.** (A) hPDLSCs-derived neurons start their development as rounded spheres that initiate neurite outgrowth at a single site on the plasma membrane. (B) These later transform into cells containing several short neurites developed around the cell body. (C) the cytoskeletal network is reorganized.  $\beta$ -III tubulin accumulates densely under the cellular membrane of the cell body and in cell neurites while actin microfilaments are mainly found in cell neurites. (D) The peripheral domain in the growth cone of hPDLSCs-derived neurons is composed of radial F-actin bundles and the central domain contains  $\beta$ -III tubulin microtubules. (E) Micrographs showing that the growth cone also contains filopodia and vesicles on the cell surface. (F and G) At later stages of development, hPDLSCs-derived neurons gradually adopt a complex morphology (F) giving rise to a variety of neuron-like forms (G). (H) Cytoskeletal protein  $\beta$ -III tubulin and F-actin staining shown that hPDLSCs-derived neurons develop distinct axon-like and dendrite-like processes (numbers locate the areas shown in higher power). The escale bars are 25  $\mu\text{m}$  in the light microscope images, and 10  $\mu\text{m}$  in the scanning electron micrographs. SEM, scanning electron microscopy; LM, light microscopy; b, actin bundles; v, vesicles, f, filopodia.

**Figure 4. hPDLSCs-derived neurons have developed well-differentiated axonal-like and dendritic-like domains.** (A) Scanning electron micrographs show that hPDLSCs-derived neurons are composed of multiple branched processes with different spine-like protusions highly similar to filopodium, mushroom, thin, stubby, and branched dendritic spines shapes. (B-D) hPDLSCs-derived neurons also display different types of axonal branch-like structures, including bifurcation (B), terminal arborization (C), and collateral formation (D) (inserts and numbers locate the areas showed in higher power). The escale bars are 25  $\mu\text{m}$  in light microscope images and 5  $\mu\text{m}$  in the scanning electron micrographs. SEM, scanning electron microscopy; LM, light

microscopy; s, spine-like protusions; f, filopodium; m, mushroom; t, thin; stubby; b, branched. B, bifurcation; a, arborization; c, collateral formation.

**Figure 5. hPDLSCs-derived neurons are connected by synapse-like interactions.** (A and B) hPDLSCs-derived neurons connect to one another (A) through different types of synapses-like interactions, including dendrodendritic-like, axoaxonic-like and axodendritic-like synapses (B). (C) Synapse-associated proteins Cx43, Synaptophysin and Synapsin1 are found in the cell membrane of hPDLSCs-derived neurons at the neurite contact areas. Scale bar: 25  $\mu\text{m}$ . LM, light microscopy; DD, dendrodendritic-like synapse; AA, axoaxonic-like and synapse; AD, axodendritic-like synapse.

**Figure 6. Nuclear shape remodeling occurs during neurogenesis from hPDLSCs.** (A-I) The nucleus located in the center of the cell starts to move towards an asymmetrical position within the cell. (J-Z) This nucleus movement is accompanied by the transient formation of segmented nuclei connected by an internuclear bridge (J-T). Finally, there is restoration of the irregular, but non-segmented, nucleus with an eccentric position within PDL-derived neurons (U-Z). The scale bars in  $\beta$ -III tubulin and DAPI images are 50  $\mu\text{m}$  and 10  $\mu\text{m}$  for confocal 3D images of nuclei.

**Figure 7. Neurogenic niches in the adult mammalian brain also contains cells with irregular nuclei.** (A and B) Morphological analysis reveals that the adult rodent V-SVZ of the anterolateral ventricle wall (A), as well as the SGZ of the hippocampal dentate gyrus (B), contain cells with nuclear shapes highly similar to those observed in during *in vitro* neurogenesis from hPDLSCs. Scale bar: 10  $\mu\text{m}$ . LV, lateral ventricle; GLC, granule cell layer.

**Figure 8. Nuclear shape in PDL-derived neurons.** (A) No segmented nuclei are observed when PDL-derived neurons gradually acquired cellular polarity and more mature, neuronal-like morphology. (B) The nuclear volume shrinks as the cells become rounded during neurogenesis. Data represent mean  $\pm$  S.E. of ten independent experiments. The scale bar in  $\beta$ -III tubulin and DAPI images are 50  $\mu\text{m}$  and 10  $\mu\text{m}$  for confocal 3D images of nuclei.

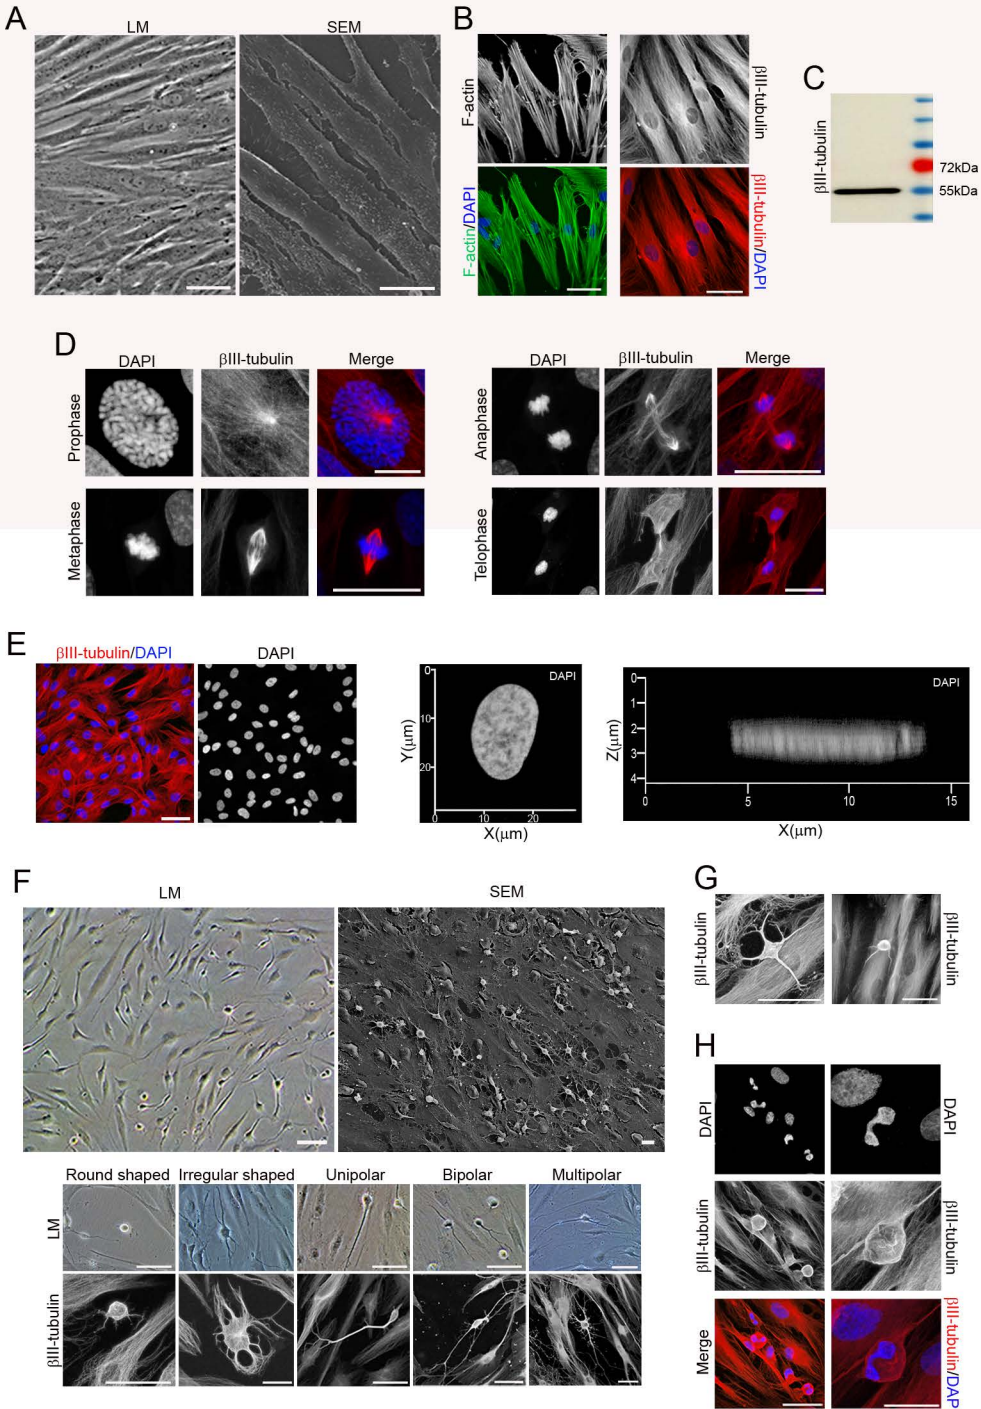

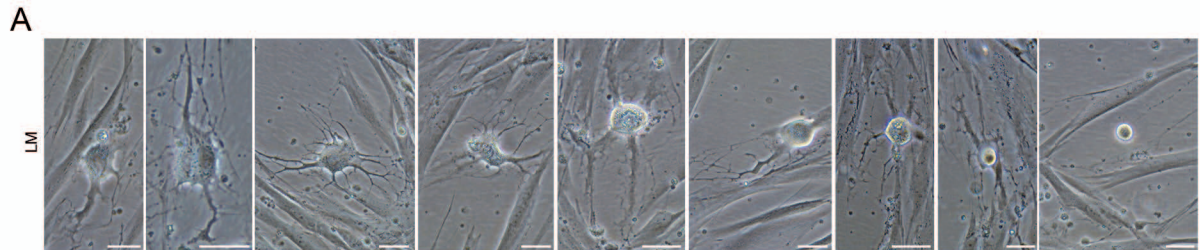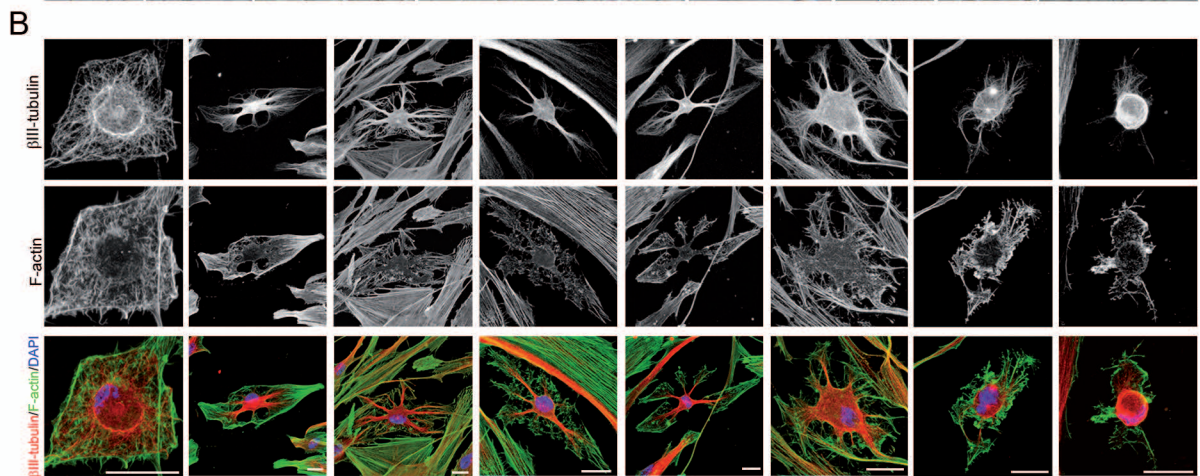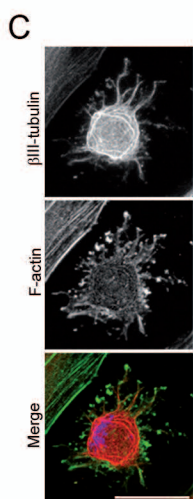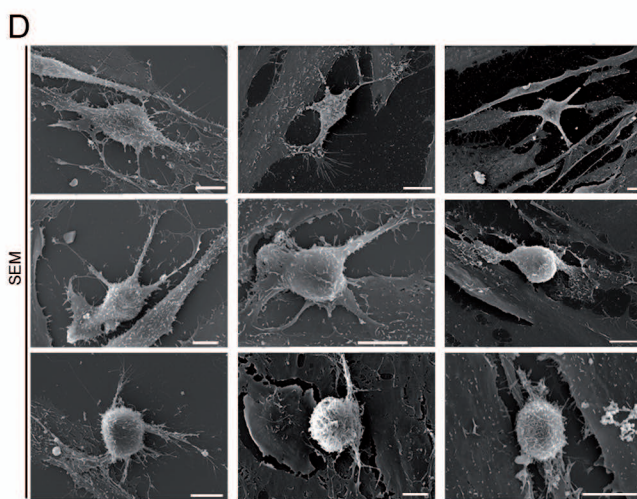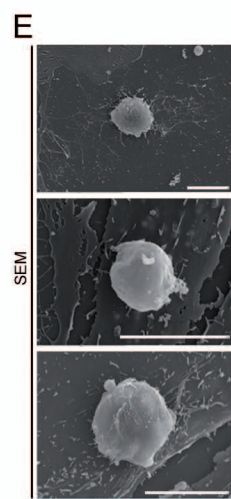

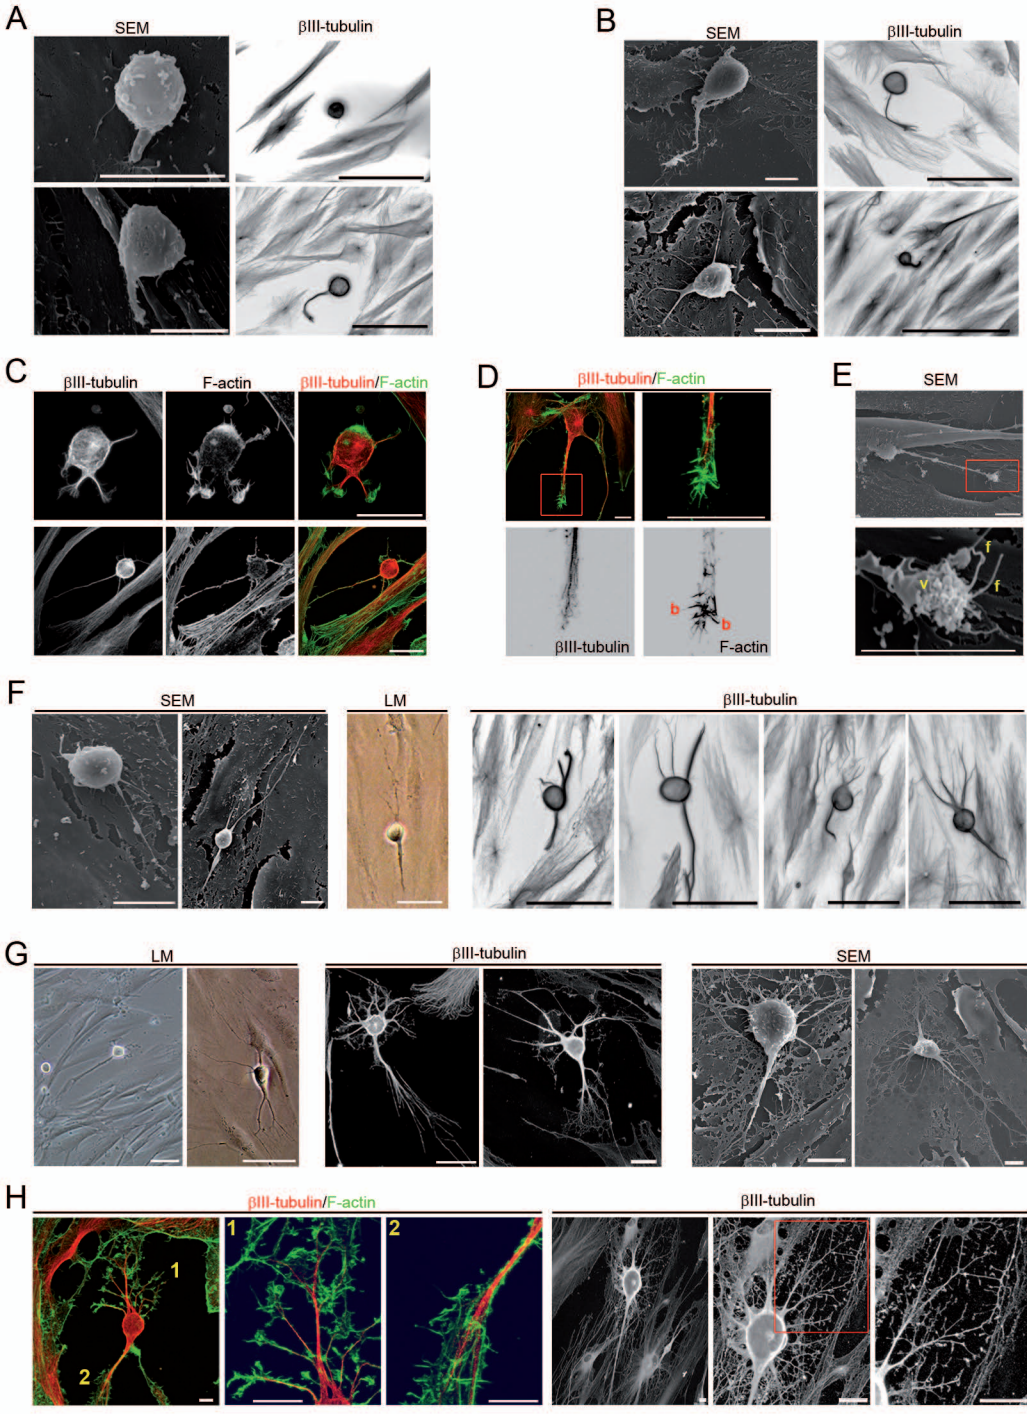



**A** SEM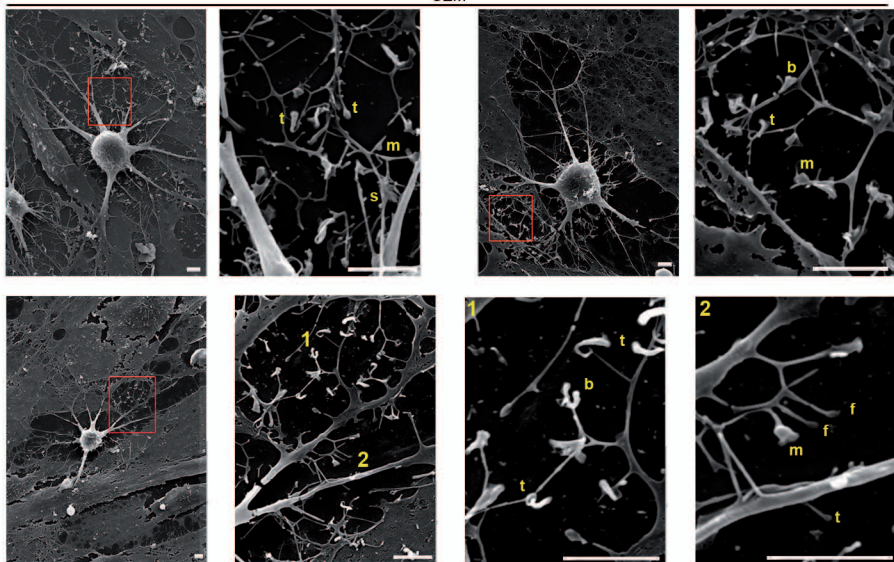**B**

SEM      dendritic-like processes      axon-like processes

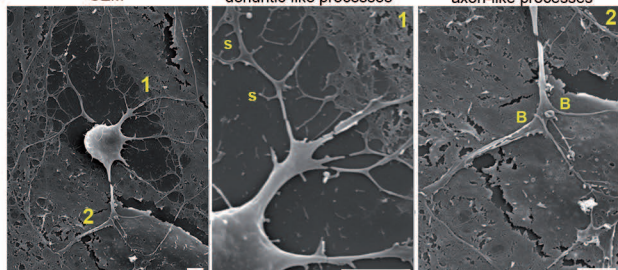 $\beta$ III-tubulin

LM

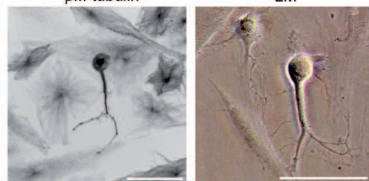**C**

SEM      dendritic-like processes      axon-like processes

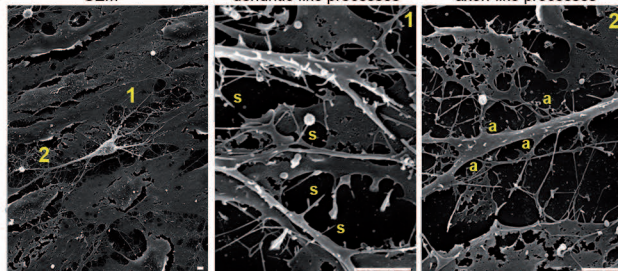 $\beta$ III-tubulin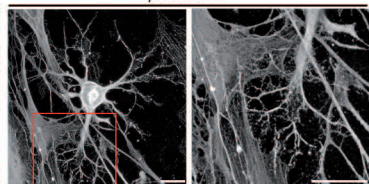**D**

SEM      axon-like processes

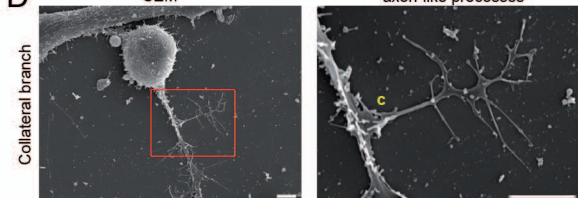 $\beta$ III-tubulin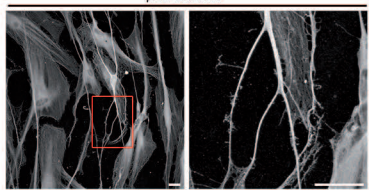

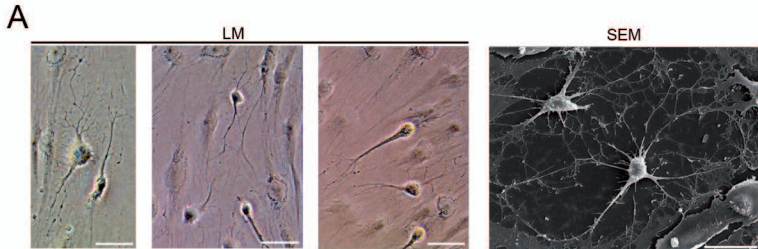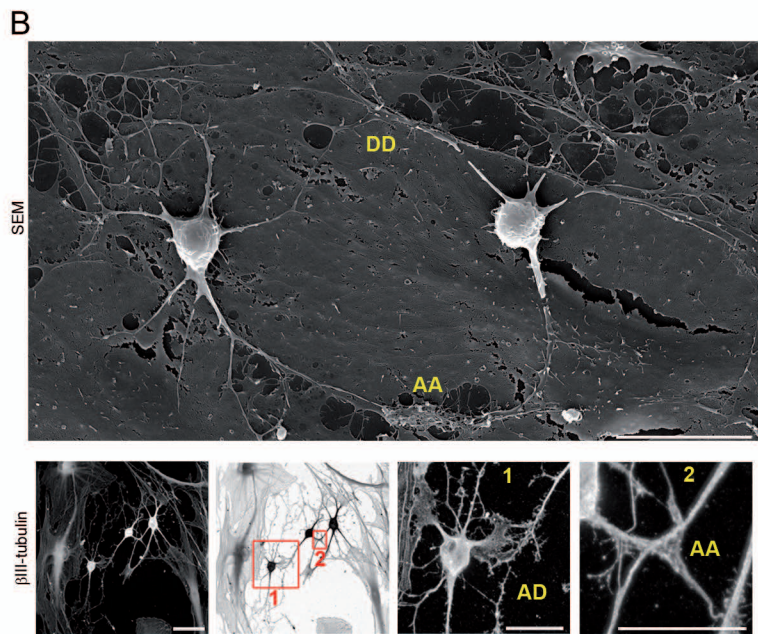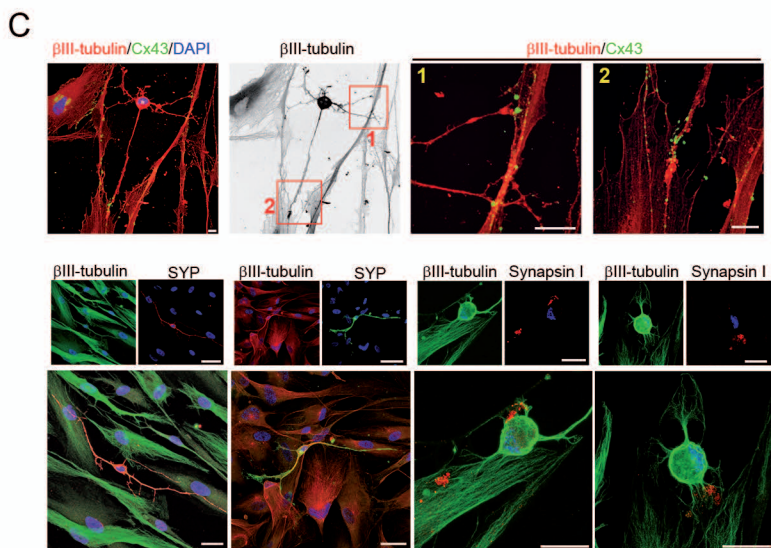

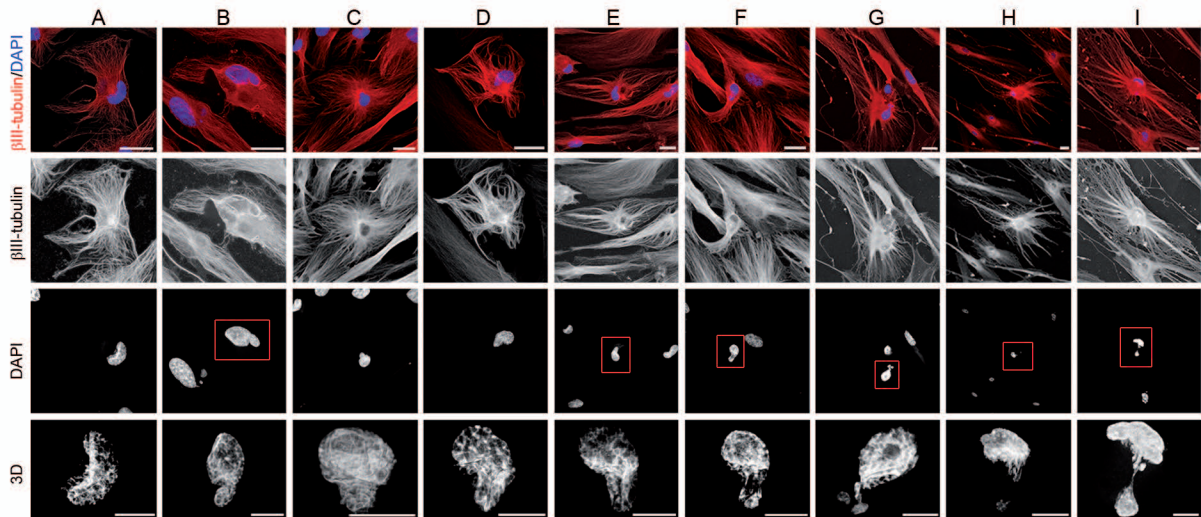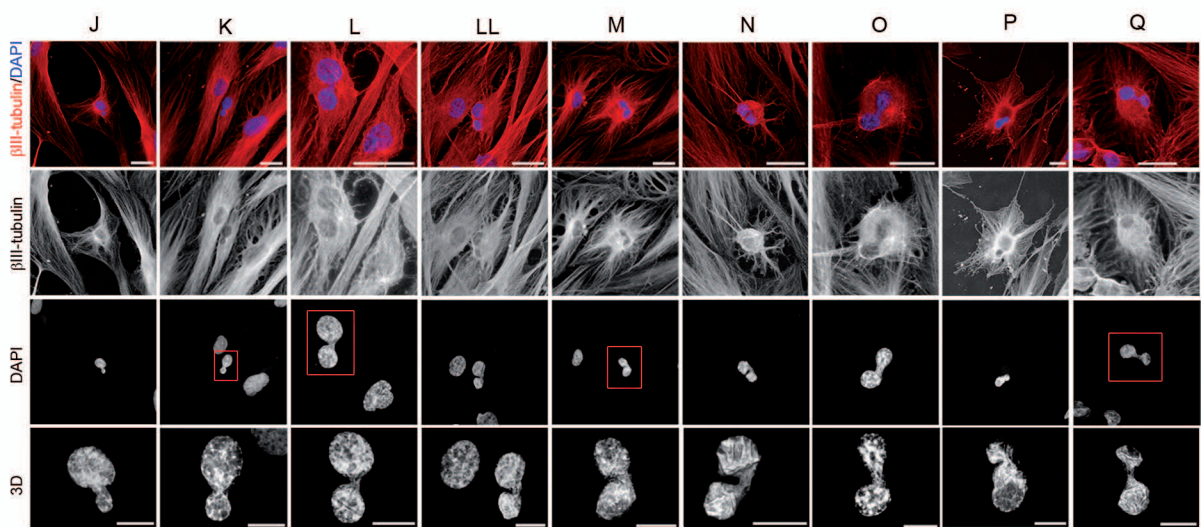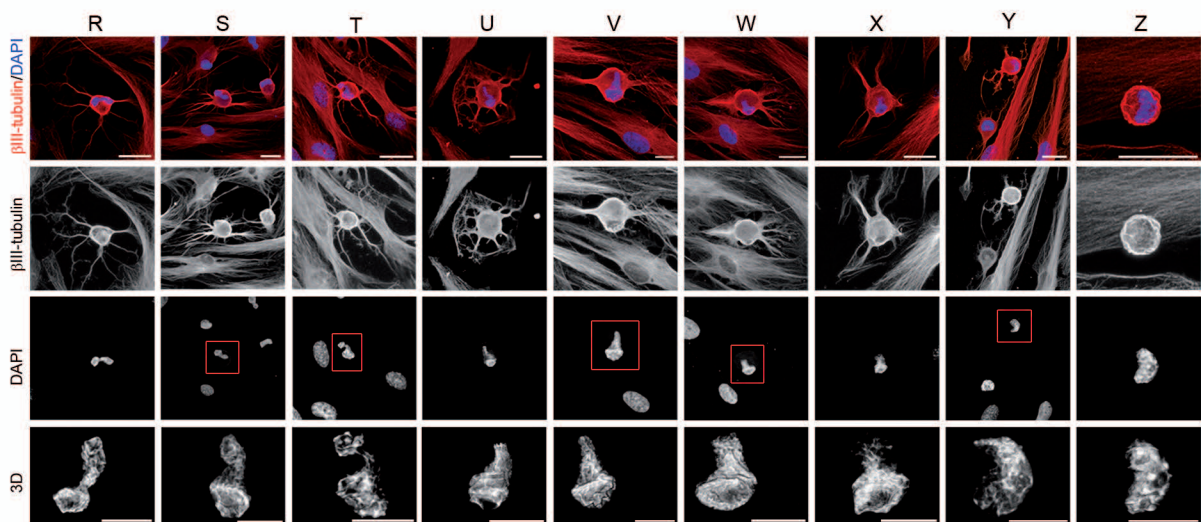

A

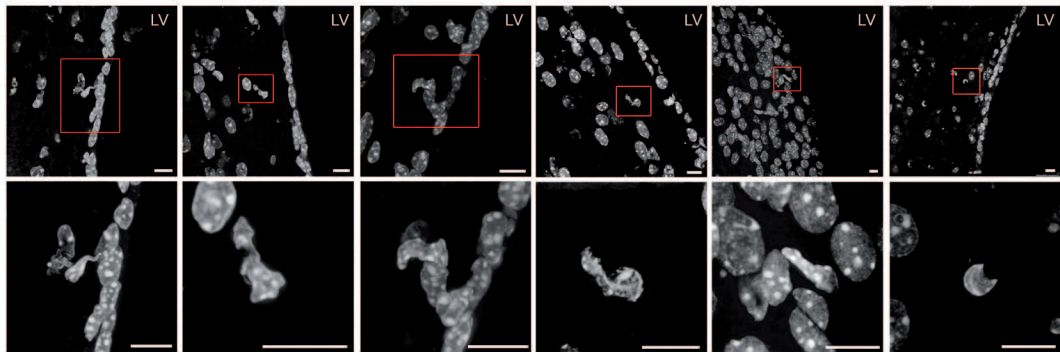

B

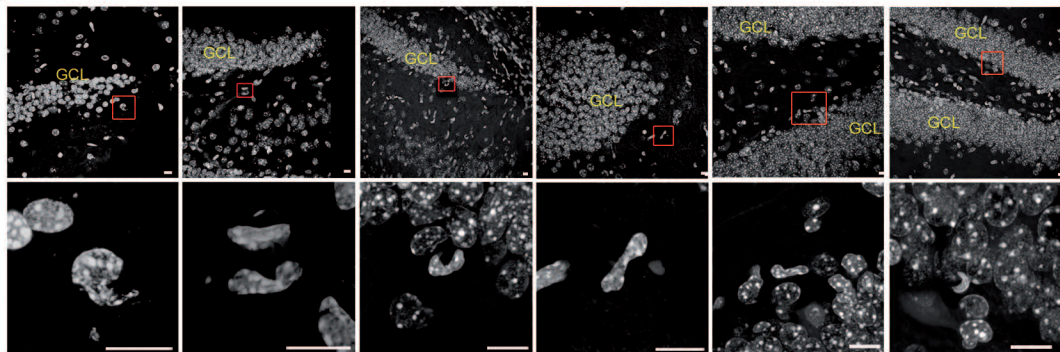

**A**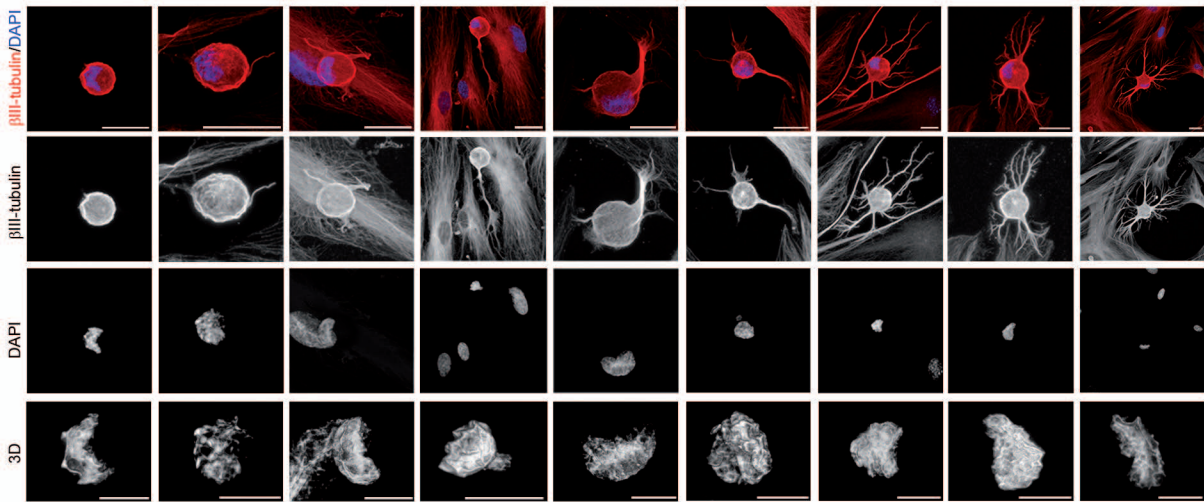**B**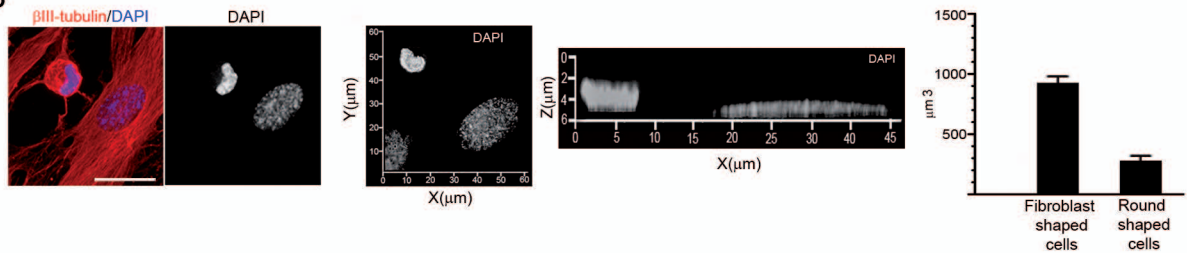

Source: https://www.biorxiv.org/content/10.1101/325613v3.full.pdf
